# Supplementary material for: Is the ocean surface a source of nitrous acid (HONO) in the marine boundary layer?
Source: Copernicus journal article supplement (doi:10.5194/acp-2021-532), 2021-07-07
Supplement: Supplementary file 1 [file acp-2021-532-supplement.pdf]

**Supporting Information for:**

# Is the ocean surface a source of HONO in the marine boundary layer?

---

**Leigh R. Crilley<sup>1,a</sup>, Louisa J. Kramer<sup>1,b</sup>, Francis D. Pope<sup>1</sup>, Chris Reed<sup>2,c</sup>, James D. Lee<sup>2</sup>, Lucy J. Carpenter<sup>2</sup>, Lloyd D. J. Hollis<sup>3</sup>, Stephen M. Ball<sup>3</sup>, and William J. Bloss<sup>1</sup>**

*1. School of Geography, Earth and Environmental Sciences, University of Birmingham, Birmingham, United Kingdom*

*2. Wolfson Atmospheric Chemistry Laboratory (WACL), Department of Chemistry, University of York, Heslington, York, United Kingdom*

*3. School of Chemistry, University of Leicester, Leicester, United Kingdom*

*a. now at: Department of Chemistry, York University, Toronto, ON, Canada*

*b. now at Ricardo Energy & Environment, Harwell, Oxfordshire, OX11 0QR, UK.*

*c. now at: Facility for Airborne Atmospheric Measurements (FAAM), Cranfield University, Cranfield, UK*

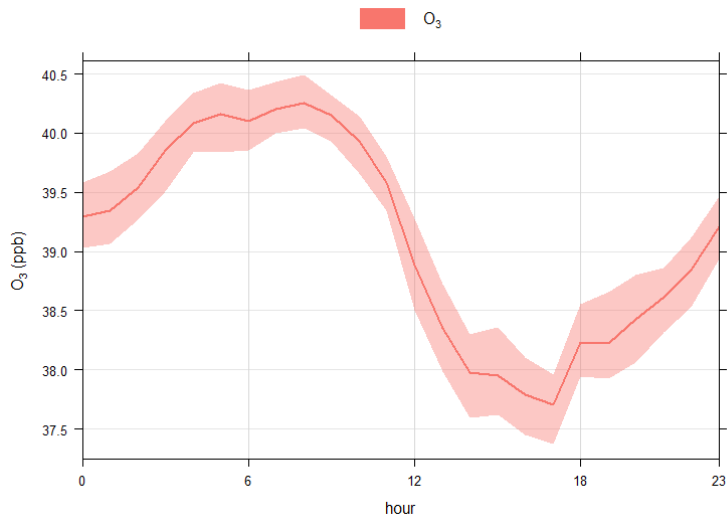

Figure S1: Mean diurnal profile of ozone mixing ratio at CVAO during the campaign.

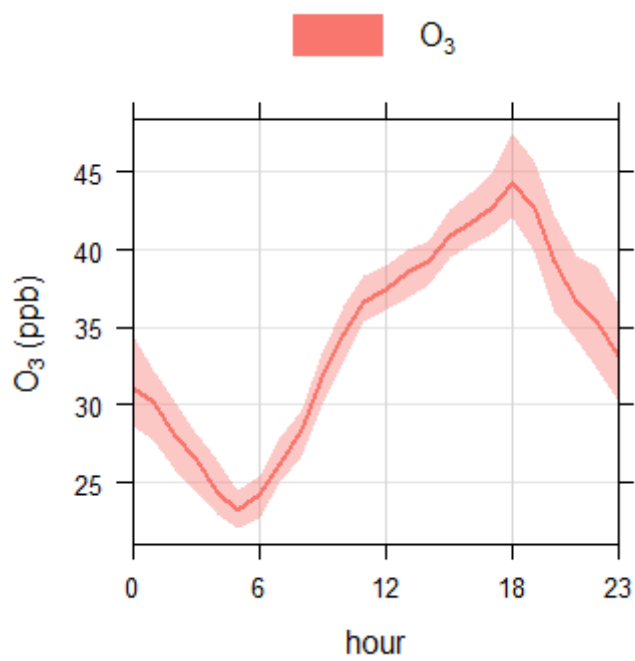

Fig S2: Mean diurnal profile of ozone mixing ratio at WAO during the campaign.

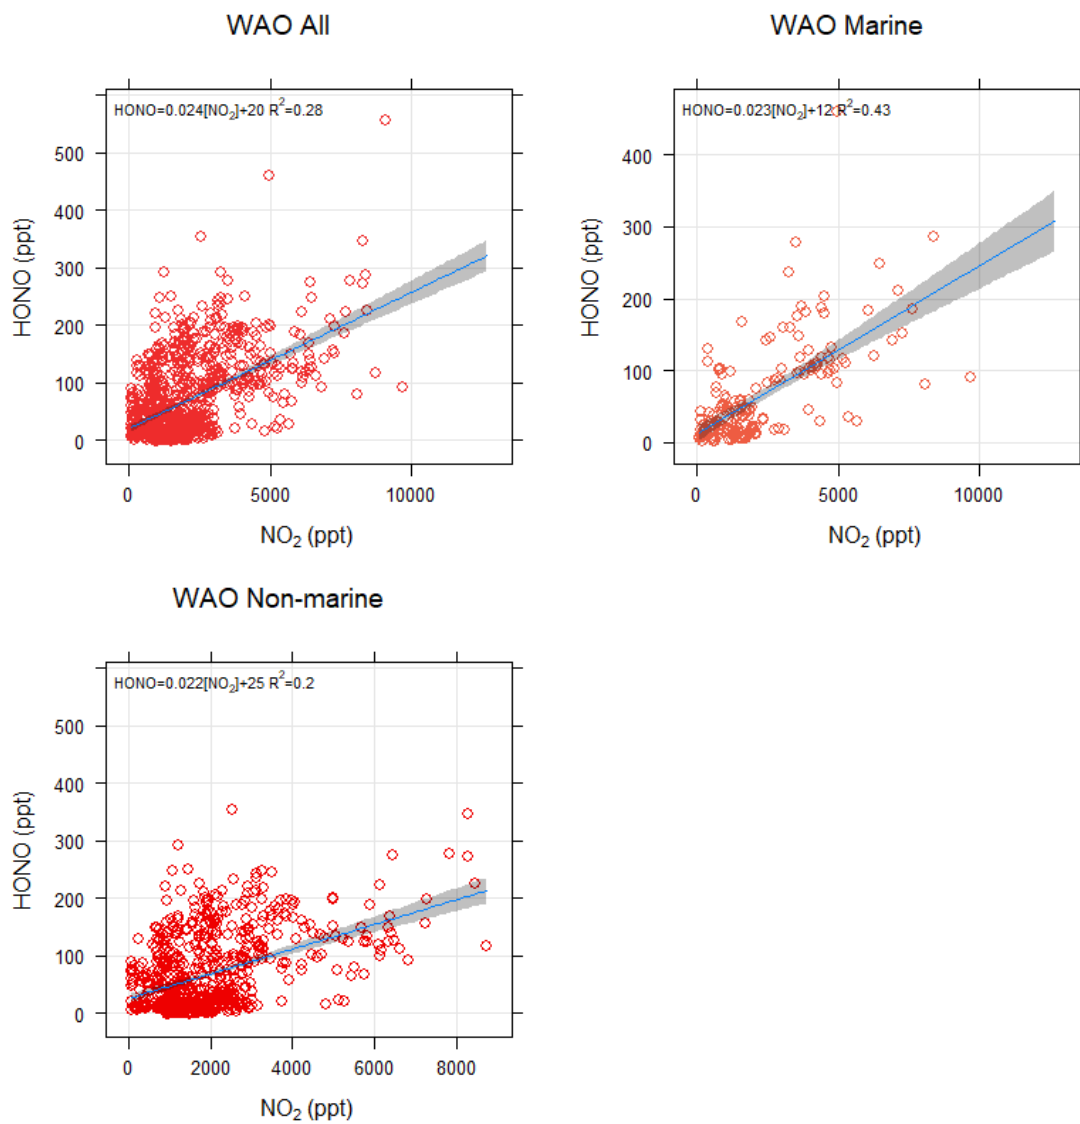

Figure S3: Scatterplots of HONO vs NO<sub>2</sub> at WAO for different periods as defined in Table 1.

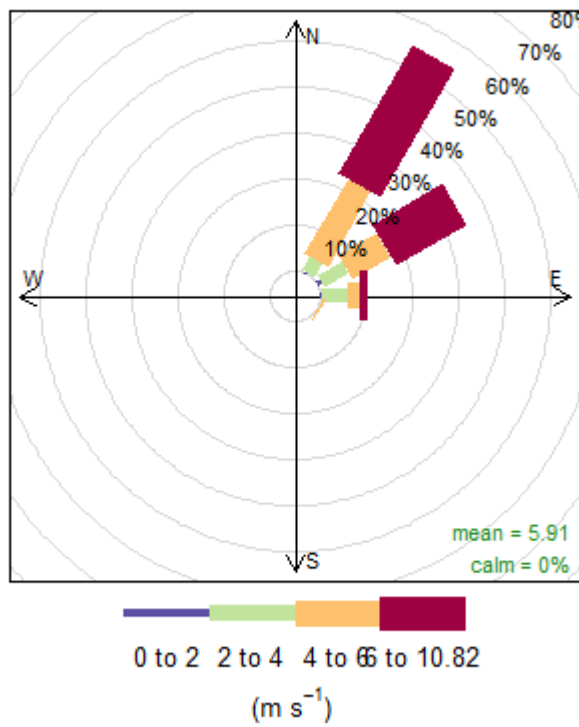

**Frequency of counts by wind direction (%)**

Figure S4: Wind rose plot for CVAO

NOAA HYSPLIT MODEL  
Backward trajectories ending at 0000 UTC 29 Nov 15  
GDAS Meteorological Data

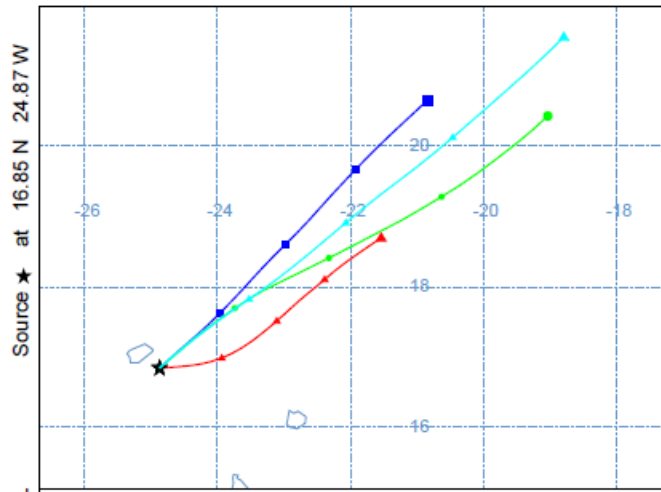

Fig S5: 24hr back trajectories at CVAO on the 25<sup>th</sup> (light blue), 26<sup>th</sup> (green), 27<sup>th</sup> (dark blue) and 28<sup>th</sup> (red) November 2015 at midnight. The black star represents the location of CVAO and the symbols show 6 hr intervals.

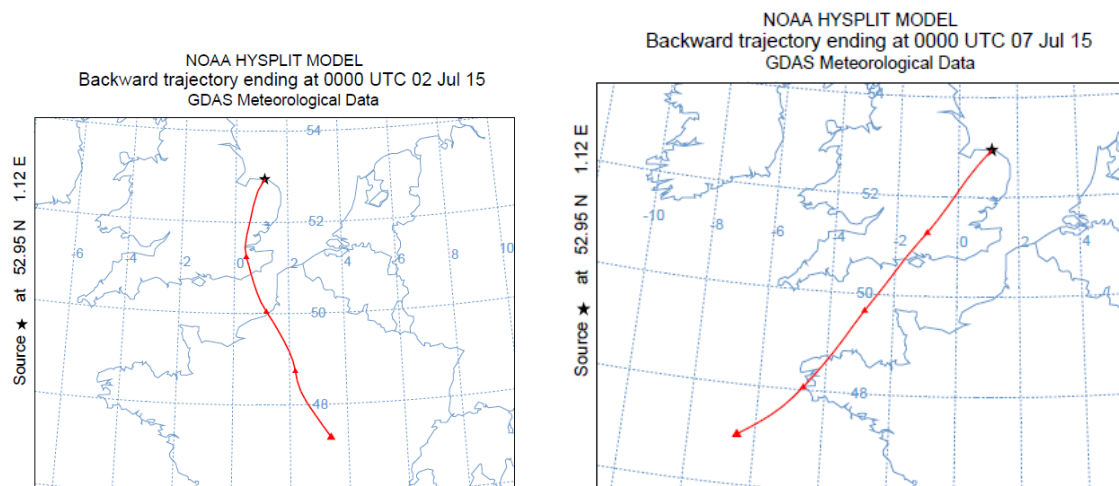

Fig S6: Representative 24hr back trajectories during non-marine periods at WAO. The black star represents the location of WAO and the red triangles show 6 hr intervals.

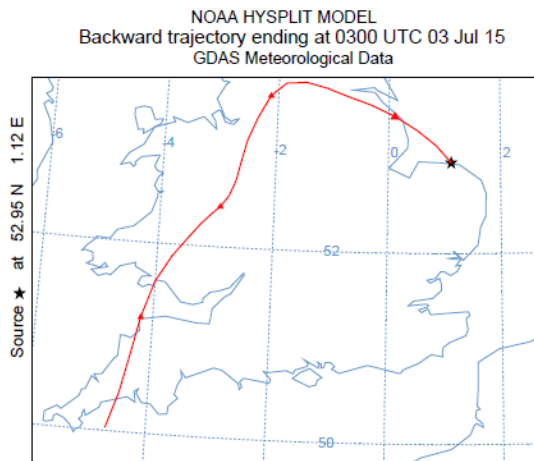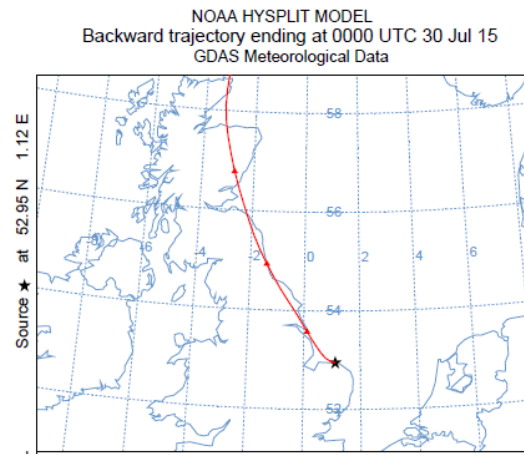

Fig S7: Representative 24hr back trajectories at WAO during typical marine air periods.



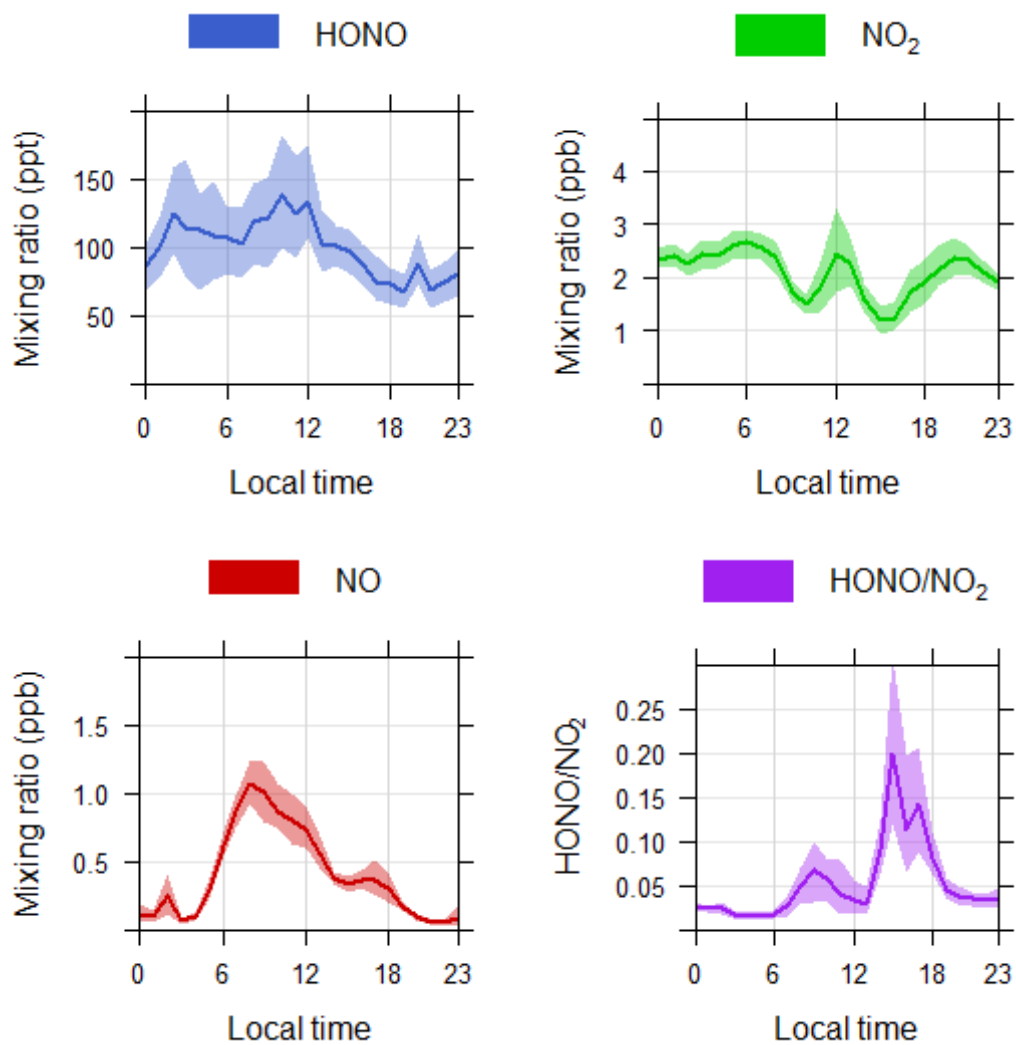

Figure S8: Diurnal profiles for WAO non-marine air.

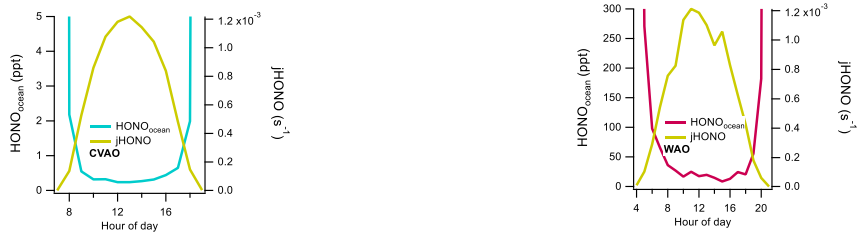

Figure S9: Calculated HONO mixing ratios for conversion from NO<sub>2</sub> on the sea surface (HONO<sub>ocean</sub>) calculated via Eqn 2 with using the rate coefficient of C<sub>HONO</sub> = 0.033 hr<sup>-1</sup> from Zha et al. (2014) and the measured HONO photolysis frequency j(HONO) at both sites. HONO<sub>ocean</sub> only calculated for daylight hours, as indicated by jHONO. Note different y axis scales.

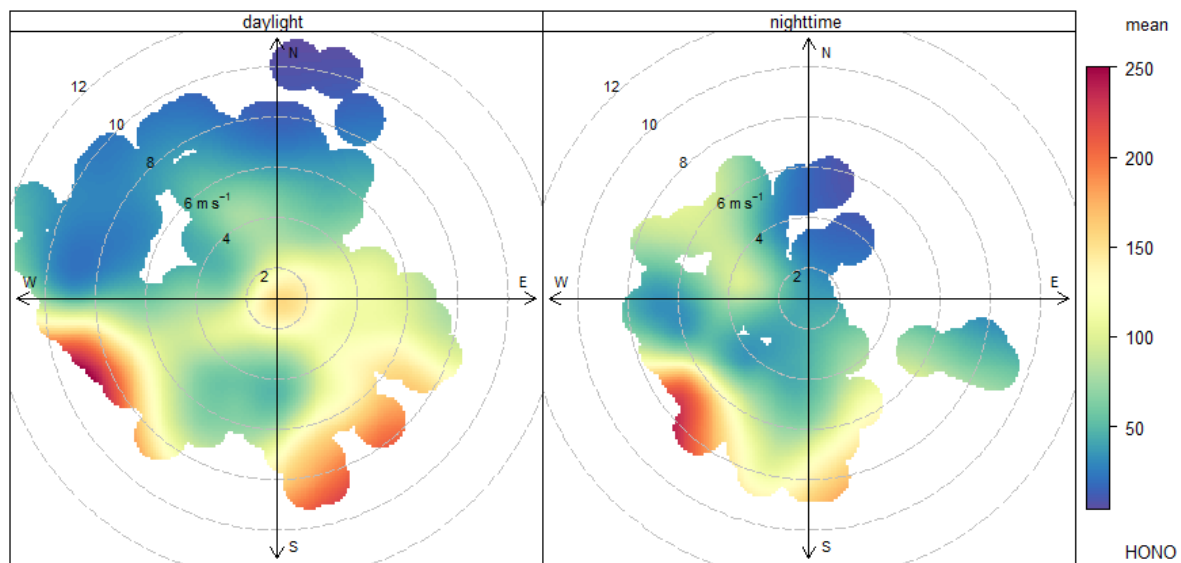

Figure S10: Polar plots of measured HONO mixing ratio (ppt) for day and night at WAO for the whole measurement period.

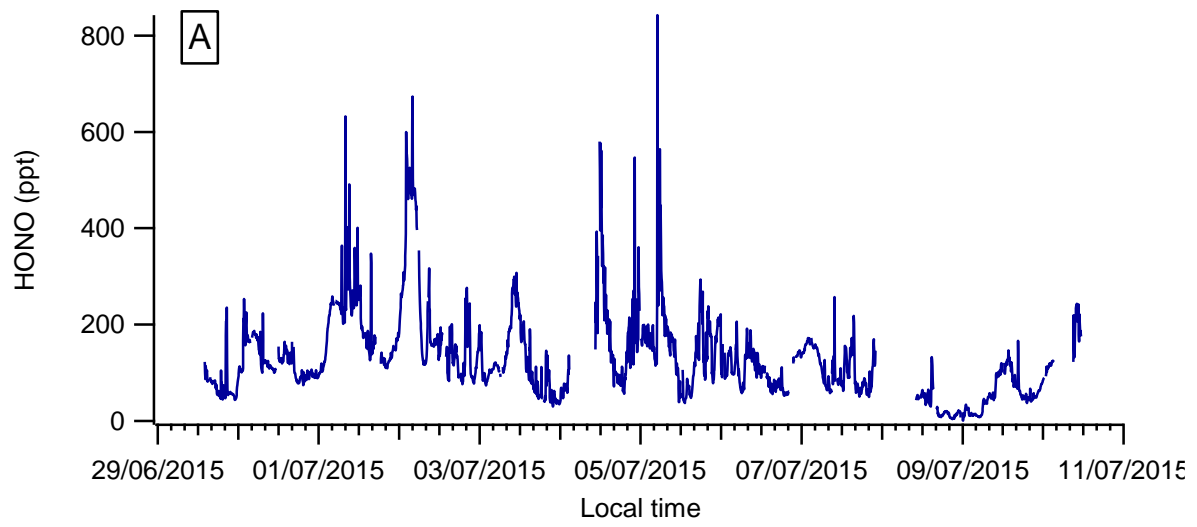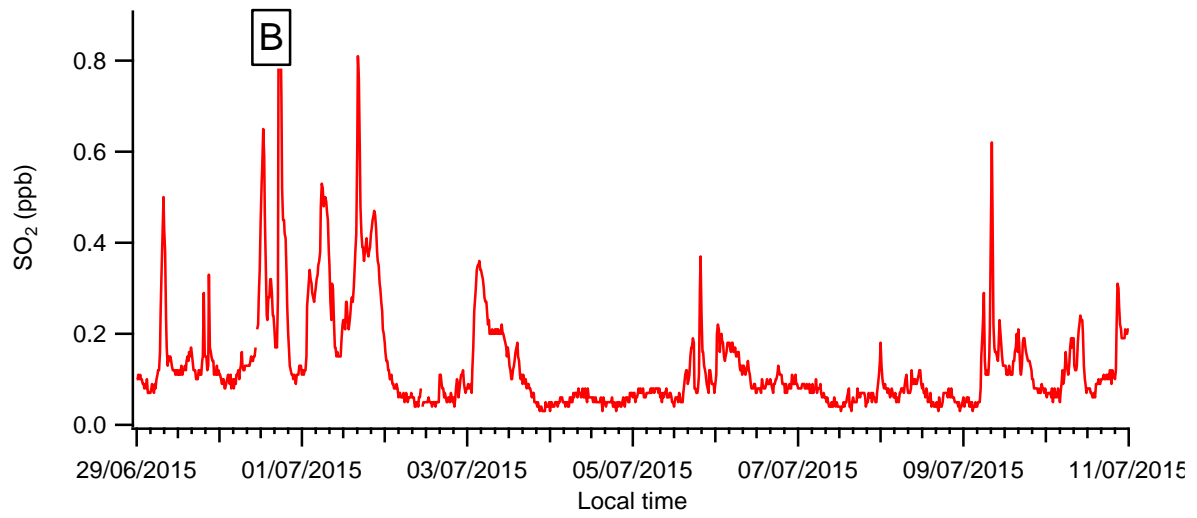

Figure S11: Time series of HONO (ppt) and SO<sub>2</sub> (ppb) at WAO.
